# Supplementary material for: Contrast-Enhanced Ultrasound (CEUS) for the Evaluation of Bosniak III Complex Renal Cystic Lesions—A 10-Year Specialized European Single-Center Experience with Histopathological Validation
Source: MDPI journal article supplement (doi:10.3390/medicina56120692), 2020-12-12
Supplement: s1 [file s1]

**Table S1.** Overview of clinical characteristics, imaging findings, treatment and histopathology of all included patients. RCC—renal cell carcinoma, HU—Hounsfield units, L—left, R—right. CEUS—contrast-enhanced ultrasound, CT—computed tomography, FU—follow-up, MRI—magnetic resonance imaging, F—female, M—male.

| Patient | Sex | Age | Location | Size (cm) | Native B-mode                             | Vascularization (Color Doppler) | CEUS                    | CT                                                                                 | MRI                                    | Treatment: Histopathology                          | Follow-Up |
|---------|-----|-----|----------|-----------|-------------------------------------------|---------------------------------|-------------------------|------------------------------------------------------------------------------------|----------------------------------------|----------------------------------------------------|-----------|
| #1      | F   | 49  | R        | 5.6       | Cystic, septated                          | -                               | Intraseptal             | -                                                                                  | Intraseptal enhancing<br>→ Bosniak IIF | Partial nephrectomy: Clear-cell RCC                | -         |
| #2      | M   | 54  | L        | 3.0       | Cystic, hypoechoic areas, wall thickening | -                               | Peripheral              | -                                                                                  | -                                      | Partial nephrectomy: chromophobe RCC               | -         |
| #3      | F   | 61  | R        | 3.5       | Cystic, septated                          | -                               | Peripheral, intraseptal | -                                                                                  | -                                      | Partial nephrectomy: clear-cell RCC                | -         |
| #4      | F   | 43  | R        | 1.6       | Cystic                                    | -                               | Peripheral              | -                                                                                  | -                                      | Partial nephrectomy: clear-cell RCC                | -         |
| #5      | F   | 64  | L        | 5.0       | Cystic, focally thickened septa           | -                               | Intraseptal             | -                                                                                  | -                                      | Partial nephrectomy: clear-cell partial cystic RCC | -         |
| #6      | M   | 74  | L        | 2.0       | Cystic                                    | -                               | Peripheral, intraseptal | -                                                                                  | -                                      | Partial nephrectomy: clear-cell RCC                | -         |
| #7      | F   | 66  | L        | 7.0       | Cystic, complex                           | -                               | Intraseptal             | -                                                                                  | -                                      | Partial nephrectomy: multilocular cystic RCC       | -         |
| #8      | M   | 54  | L        | 1.5       | Cystic, wall thickening                   | -                               | Intraseptal             | -                                                                                  | -                                      | Partial nephrectomy: clear-cell RCC                | -         |
| #9      | M   | 76  | L        | 1.6       | Cystic                                    | -                               | Peripheral, wash-out    | -                                                                                  | -                                      | Partial nephrectomy: papillary RCC                 | -         |
| #10     | F   | 66  | R        | 1.5       | Cystic                                    | -                               | Intraseptal             | -                                                                                  | -                                      | Partial nephrectomy: clear-cell RCC                | -         |
| #11     | M   | 75  | L        | 2.7       | Cystic, focally thickened septa           | -                               | Intraseptal             | -                                                                                  | -                                      | Partial nephrectomy: Papillary RCC                 | -         |
| #12     | M   | 52  | L        | 1.5       | Cystic, focally thickened septa           | -                               | Intraseptal             | -                                                                                  | -                                      | Partial nephrectomy: clear-cell RCC                | -         |
| #13     | M   | 68  | L        | 1.5       | Partially cystic                          | -                               | Peripheral              | -                                                                                  | -                                      | Partial nephrectomy: clear-cell RCC                | -         |
| #14     | M   | 86  | L        | 4.0       | Cystic, septated                          | -                               | Intraseptal             | Septated, calcified, early enhancement, wash-out in delayed phase<br>→ Bosniak III | -                                      | Nephrectomy: cystic clear-cell RCC                 | -         |

|     |   |    |   |      |                                              |   |                                                       |                                                   |   |                                                                                 |   |
|-----|---|----|---|------|----------------------------------------------|---|-------------------------------------------------------|---------------------------------------------------|---|---------------------------------------------------------------------------------|---|
| #15 | M | 63 | R | 2.0  | Cystic                                       | - | Peripheral                                            | -                                                 | - | Nephrectomy:<br>clear-cell RCC                                                  | - |
| #16 | F | 62 | L | 2.5  | Partially cystic                             | - | Peripheral,<br>intraseptal<br>wash-in/wash-<br>out    | -                                                 | - | Renal biopsy:<br>oncocytoma                                                     | - |
| #17 | F | 64 | R | 3.5  | Cystic                                       | - | Intraseptal                                           | -                                                 | - | Partial nephrectomy:<br>cystic hamartoma                                        | - |
| #18 | M | 67 | R | 3.0  | Partially cystic, focally<br>thickened septa | - | Wash-in                                               | -                                                 | - | Partial nephrectomy:<br>cyst, no malignancy                                     | - |
| #19 | M | 71 | L | 1.2  | Cystic                                       | - | Peripheral                                            | -                                                 | - | Partial nephrectomy:<br>cyst, no malignancy                                     | - |
| #20 | F | 48 | L | 10.0 | Cystic, septated                             | - | Intraseptal                                           | -                                                 | - | Partial nephrectomy:<br>adult cystic nephroma                                   | - |
| #21 | M | 76 | R | 2.0  | Cystic                                       | - | Peripheral and<br>Intraseptal<br>wash-in/wash-<br>out | -                                                 | - | Partial nephrectomy: oncocytoma                                                 | - |
| #22 | M | 46 | R | 0.8  | Cystic                                       | - | Peripheral<br>wash-in/wash-<br>out                    | -                                                 | - | Partial nephrectomy: papillary<br>adenoma                                       | - |
| #23 | F | 69 | L | 8.0  | Cystic, septated                             | - | Intraseptal                                           | -                                                 | - | Partial nephrectomy:<br>cyst, no malignancy                                     | - |
| #24 | M | 69 | R | 2.5  | Cystic                                       | - | Peripheral<br>wash-in/wash-<br>out                    | -                                                 | - | Partial nephrectomy: Papillary RCC                                              | - |
| #25 | F | 35 | L | 12.0 | Cystic, septated                             | - | Intraseptal                                           | -                                                 | - | -                                                                               | - |
| #26 | M | 66 | R | 5.0  | Cystic                                       | - | Peripheral                                            | -                                                 | - | Partial nephrectomy: Hemorrhagic,<br>xanthogranulomatous cyst, no<br>malignancy | - |
| #27 | M | 67 | R | 7.0  | Cystic, septated, partially<br>calcified     | - | Peripheral,<br>intraseptal                            | Septated, partially<br>calcified<br>→ Bosniak IIF | - | Partial nephrectomy: oncocytoma                                                 | - |
| #28 | M | 57 | L | 3.5  | Cystic, septated                             | - | Peripheral,<br>intraseptal                            | -                                                 | - | -                                                                               | - |
| #29 | F | 75 | L | 1.0  | Cystic                                       | - | Peripheral                                            | -                                                 | - | -                                                                               | - |
| #30 | M | 78 | L | 4.0  | Cystic, septated                             | - | Peripheral,<br>intraseptal                            | -                                                 | - | -                                                                               | - |
| #31 | M | 77 | R | 2.0  | Cystic, septated                             | - | Intraseptal                                           | -                                                 | - | -                                                                               | - |
| #32 | M | 83 | L | 4.7  | Cystic                                       | - | Peripheral                                            | -                                                 | - | Partial nephrectomy:                                                            | - |

|     |   |    |   |     |                             |   |                              |                                                                             |                                                                                                                 |                                     |                                             |
|-----|---|----|---|-----|-----------------------------|---|------------------------------|-----------------------------------------------------------------------------|-----------------------------------------------------------------------------------------------------------------|-------------------------------------|---------------------------------------------|
|     |   |    |   |     |                             |   |                              |                                                                             |                                                                                                                 | clear-cell RCC                      | CEUS (8 months, 30 months, 42 months): idem |
| #33 | M | 76 | L | 1.0 | Cystic, septated            | - | Peripheral                   | No contrast-enhancement, septated, calcified → hemorrhagic cyst, Bosniak II | -                                                                                                               | -                                   | -                                           |
| #34 | M | 71 | R | 1.6 | Partially cystic            | - | Peripheral                   | -                                                                           | -                                                                                                               | -                                   | -                                           |
| #35 | M | 48 | R | 2.5 | Cystic, septated            | - | Intraseptal wash-in/wash-out | -                                                                           | -                                                                                                               | Partial nephrectomy: clear-cell RCC | -                                           |
| #36 | F | 82 | R | 6.0 | Partially cystic            | - | Peripheral, intraseptal      | -                                                                           | Diffusion-restricted, peripheral T1-hyperintense, central T1-hypointense, central T2-hyperintense → Bosniak III | -                                   | -                                           |
| #37 | M | 76 | R | 2.0 | Cystic, septated            | - | Peripheral                   | Septated, inhomogeneous → hemorrhagic cyst, Bosniak II                      | -                                                                                                               | -                                   | -                                           |
| #38 | M | 60 | R | 1,2 | Cystic, septated            | - | Peripheral                   | Septated, contrast-enhanced → Bosniak type IIF                              | -                                                                                                               | Partial nephrectomy: clear-cell RCC | -                                           |
| #39 | M | 92 | L | 3.5 | Cystic                      | - | Peripheral                   | -                                                                           | -                                                                                                               | -                                   | -                                           |
| #40 | M | 65 | L | 4.0 | Cystic, septated            | - | Intraseptal                  | Septated, contrast-enhanced → Bosniak type III                              | -                                                                                                               | -                                   | -                                           |
| #41 | M | 48 | R | 1.7 | Cystic                      | - | Peripheral                   | -                                                                           | -                                                                                                               | -                                   | CEUS (6 months, 12 months): idem            |
| #42 | M | 41 | R | 6.5 | Cystic, partially calcified | - | Peripheral, intraseptal      | -                                                                           | -                                                                                                               | -                                   | -                                           |
| #43 | F | 82 | R | 1.5 | Partially cystic            | - | Peripheral                   | wall thickening, contrast-enhanced                                          | -                                                                                                               | -                                   | -                                           |

|     |   |    |   |     |                                 |   |                             |                                                                          |                                                                                                                        |   |   |
|-----|---|----|---|-----|---------------------------------|---|-----------------------------|--------------------------------------------------------------------------|------------------------------------------------------------------------------------------------------------------------|---|---|
| #44 | M | 52 | L | 1.5 | Cystic                          | - | Peripheral wash-in/wash-out | → Bosniak type III<br>Hypernse (HU 40)<br>→ hemorrhagic cyst, Bosniak II | -                                                                                                                      | - | - |
| #45 | M | 77 | R | 5.0 | Cystic, septated                | - | Intraseptal                 | -                                                                        | -                                                                                                                      | - | - |
| #46 | M | 49 | R | 3.0 | Cystic, septated                | - | Peripheral, intraseptal     | -                                                                        | Septated T2-hypotense<br>Septa, no contrast-enhancement,<br>no diffusion restriction<br>→ hemorrhagic cyst, Bosniak II | - | - |
| #47 | M | 63 | L | 4.0 | Cystic, septated                | - | Intraseptal                 | -                                                                        | -                                                                                                                      | - | - |
| #48 | F | 47 | L | 1.5 | Cystic, focally thickened septa | - | Centripetal                 |                                                                          | Contrast-enhancing, mural thickening,<br>→ Bosniak III                                                                 | - | - |

“-“ – No / None or not available.
